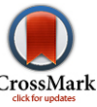

## Correction

# Correction: The Origin and Early Evolution of Sauria: Reassessing the Permian Saurian Fossil Record and the Timing of the Crocodile-Lizard Divergence

## The PLOS ONE Staff

The reported age of the Kupferschiefer fossil,  $257.3 \pm 2.6$  Ma, is incorrect. The authors have provided the corrected age of  $257.3 \pm 1.6$  Ma.

As a result, the recommended age of the crocodile-lizard split, 254.7 Ma, is also incorrect. The correct recommended age is 255.7 Ma. The authors also report that Archosauromorpha and Lepidosauromorpha diverged prior to 255.7–258.9 Ma rather than 254.7–259.9.

## Reference

1. Ezcurra MD, Scheyer TM, Butler RJ (2014) The Origin and Early Evolution of Sauria: Reassessing the Permian Saurian Fossil Record and the Timing of the Crocodile-Lizard Divergence. PLoS ONE 9(2): e89165. doi:10.1371/journal.pone.0089165

---

**Citation:** The PLOS ONE Staff (2014) Correction: The Origin and Early Evolution of Sauria: Reassessing the Permian Saurian Fossil Record and the Timing of the Crocodile-Lizard Divergence. PLoS ONE 9(5): e97828. doi:10.1371/journal.pone.0097828

**Published:** May 13, 2014

**Copyright:** © 2014 The PLOS ONE Staff. This is an open-access article distributed under the terms of the Creative Commons Attribution License, which permits unrestricted use, distribution, and reproduction in any medium, provided the original author and source are credited.
